# Supplementary material
Source: publisher figshare collection journal article supplement (https://gsajournals.figshare.com/ndownloader/files/28388736)
Supplement: Supplementary file 1 [file 28388736]

## Sheet: By Plate
TS mutants rescued by TMAO, sorted by plate location
Plate 5A						Green = Rescue
Boone #	ts allele	ORF	ts on SC	Degree		Orange = Sensitive
Y11694	cdc53-1	YDL132W	35oC - 37oC	Large
Y11705	sub2-1	YDL084W	30oC	Small		Large = Significant difference in colony growth at 37˚C
Y11755	gfa1-97	YKL104C	30oC	Large		Medium = Less significant difference in colony growth at 37˚C
Y11752	efb1-4	YAL003W	37oC, slow 22oC - 26oC	Medium		Small = Almost indiscernable difference in colony growth at 37˚C
Y11833	rpg1-1	YBR079C	35oC	Small
Y11891	ask1-3	YKL052C	35oC - 37oC	Large
Y11867	rsc8-ts16	YFR037C	35oC - 37oC	Small
Y11906	ask1-2	YKL052C	37oC	Small
Y11921	spn1-K192N	YPR133C	37oC	Medium
Y12311	ura6-4	YKL024C	35oC, slow at 22oC - 30oC	Large
Y12293	sgv1-23	YPR161C	35oC - 37oC	Medium
Y12300	sgv1-35	YPR161C	37oC	Medium
Y12298	sgv1-80	YPR161C	35oC - 37oC	Small
Y12315	ura6-6	YKL024C	35oC	Medium
Y12326	rpn6-1	YDL097C	37oC	Medium
Y12346	brl1-2221	YHR036W	37oC	Medium
Y12352	brl1-3231	YHR036W	37oC	Medium
Y12354	brl1-C371R	YHR036W	37oC	Medium
Y12360	brl1-C371S	YHR036W	37oC	Medium
Y12366	brl1-K405I	YHR036W	37oC	Medium
Plate 4B
Boone #	ts allele	ORF	ts on SC	Degree
Y06553	ssu72-2	YNL222W	37oC	Medium
Y07780	rgr1-100	YLR071C	38.5oC	Medium
Y07751	rpt6-20	YGL048C	37oC	Small
Y05078	cdc20-1	YGL116W	37oC	Medium
Plate 2D
Boone #	ts allele	ORF	ts on SC	Degree
Y11313	ssl1-T242I	YLR005W	35oC	Large
Y10695	bms1-1	YPL217C	30oC, slow at all	Medium
Y10752	nmt1-181	YLR195C	35oC - 37oC	Medium
Y10791	rpb2-6	YOR151C	35oC - 37oC	Medium
Y10800	taf8-7	YML114C	35oC	Medium
Y10805	tap42-11	YMR028W	37oC	Medium
Y11146	tub4-ΔDSY	YLR212C	35oC - 37oC	Medium
Y11254	erg26-1	YGL001C	30oC - 35oC	Medium
Y11279	smc6-9	YLR383W	37oC - 38.5oC	Medium
Y10738	rrs1-124	YOR294W	35oC - 37oC	Small
Y10747	ret3-1	YPL010W	35oC	Small
Y10928	cef1-13	YMR213W	35oC - 37oC	Small
Y11009	luc7-1	YDL087C	35oC	Small
Plate 2C
Boone #	ts allele	ORF	ts on SC	Degree
Y10662	slu7-ts1	YDR088C	35oC	Large
Y10370	ssl2-ts	YIL143C	30oC - 35oC	Large
Y10293	vti1-11	YMR197C	30oC - 35oC	Large
Y10339	yhc1-7	YLR298C	26oC - 30oC, slow at 22oC	Medium
Y10324	rpc40-V78R	YPR110C	35oC	Medium
Y10269	nop2-3	YNL061W	35oC - 37oC	Medium
Y10156	lcb1-5	YMR296C	35oC	Medium
Y10667	slu7-ts2	YDR088C	35oC	Small
Y10614	cak1-23	YFL029C	35oC	Small
Y10307	taf7-ts1	YMR227C	35oC - 37oC	Small
Y10290	yhc1-2	YLR298C	30oC - 35oC	Small
Y10250	gcd14-4	YJL125C	35oC	Small
Y10223	mtr3-ts	YGR158C	35oC	Small
Y10197	taf6-ts	YGL112C	37oC	Small
Y10161	lcb1-2	YMR296C	30oC - 35oC	Small
Y10158	lcb1-4	YMR296C	30oC	Small
Y10124	lcb2-1	YDR062W	30oC	Small
Y10139	use1-ts	YGL098W	35oC - 37oC	Medium
Y10633	rho3-1	YIL118W	30oC - 35oC, grows at 37oC - 38.5oC	Small
Y10332	taf11-ts2	YML015C	35oC - 37oC	Small
Y10222	mob2-40	YFL034C-B	26oC - 30oC	Small
Y10219	mob2-34	YFL034C-B	30oC - 35oC	Small
Y10212	mob2-22	YFL034C-B	35oC - 37oC	Small
Y10199	mob2-11	YFL034C-B	26oC - 30oC, slow at 22oC	Small
Y10137	ypt1-3	YFL038C	37oC - 38.5oC	Small
Plate 2B
Boone #	ts allele	ORF	ts on SC	Degree
Y09957	pkc1-1	YBL105C	35oC - 37oC	Large
Y09962	pkc1-2	YBL105C	35oC - 37oC	Large
Y09967	pkc1-4	YBL105C	35oC	Large
Y09972	pkc1-3	YBL105C	37oC	Large
Y10074	scd5-D338	YOR329C	35oC	Large
Y10078	scd5-PP1D2	YOR329C	30oC - 35oC	Large
Y10082	tsc3-2	YBR058C-A	35oC	Large
Y09576	mas1-1	YLR163C	30oC - 35oC	Medium
Y09883	erg10-1	YPL028W	30oC - 35oC	Medium
Y10099	lcb2-2	YDR062W	30oC	Small
Plate 2A
Boone #	ts allele	ORF	ts on SC	Degree
Y09468	alg2-1	YGL065C	35oC	Large
Y08899	frq1-1	YDR373W	35oC - 37oC	Medium
Y09007	cdc20-2	YGL116W	37oC - 38.5oC	Medium
Y09193	sec59-ts	YMR013C	35oC - 37oC	Medium
Y09259	hsf1-848	YGL073W	37oC	Medium
Y09261	dad2-9	YKR083C	37oC	Medium
Y09267	sgt1-5	YOR057W	35oC - 37oC	Medium
Y09313	dsn1-7	YIR010W	35oC	Medium
Y09317	dsn1-8	YIR010W	35oC - 37oC	Medium
Y09328	nnf1-48	YJR112W	35oC - 37oC	Medium
Y09446	nsl1-6	YPL233W	35oC - 37oC	Medium
Y09453	sec24-20	YIL109C	26oC - 30oC	Medium
Y09500	arc35-6	YNR035C	35oC - 37oC	Medium
Y09508	spc25-1	YER018C	30oC - 35oC	Medium
Y09520	pti1-ts7	YGR156W	35oC - 37oC	Medium
Y08916	cdc46-1	YLR274W	35oC - 37oC	Small
Y08987	cdc24-3	YAL041W	35oC - 37oC	Small
Y08996	cdc1-6	YDR182W	26oC - 30oC	Small
Y09296	prp18-1202	YGR006W	35oC	Small
Y09517	spt15-P65S	YER148W	30oC - 35oC	Small
Y09459	sfi1-7	YLL003W	35oC - 37oC	Small
Plate 1D
Boone #	ts allele	ORF	ts on SC	Degree
Y06414	ccl1-ts4	YPR025C	37oC	Large
Y05603	sec9-4	YGR009C	37oC	Large
Y05582	sec14-3	YMR079W	37oC	Large
Y06453	cdc39-1	YCR093W	37oC	Medium
Y06446	pgi1-2	YBR196C	37oC	Medium
Y06420	cdc10-2	YCR002C	37oC	Medium
Y05572	sec5-24	YDR166C	37oC	Medium
Y04872	cdc25-1	YLR310C	37oC	Medium
Y04720	rho1-td	YPR165W	37oC	Medium
Y06447	cdc34-1	YDR054C	37oC	Small
Y06277	smc1-259	YFL008W	37oC	Small
Y06265	sec10-2	YLR166C	37oC	Small
Y05569	cdc12-td	YHR107C	37oC	Small
Y05361	sec17-1	YBL050W	37oC	Small
Y05129	cdc9-1	YDL164C	37oC	Small
Y05295	cog3-1	YER157W	38.5oC	Medium
Y04722	yif1-td	YNL263C	37oC	Medium
Y04662	erg11-td	YHR007C	37oC	Medium
Plate 1C
Boone #	ts allele	ORF	ts on SC	Degree
Y06499	sec8-9	YPR055W	37oC	Large
Y07766	uba1-1	YKL210W	37oC	Medium
Y07731	cdc48-9	YDL126C	35oC	Medium
Y06481	pik1-104	YNL267W	37oC	Medium
Y06477	mif2-3	YKL089W	37oC	Medium
Y06474	mcm3-1	YEL032W	37oC	Medium
Y07752	rpt6-25	YGL048C	37oC - 38.5oC	Small
Y07439	rfc4-20	YOL094C	35oC - 37oC	Small
Y07386	cdc21-ts	YOR074C	35oC	Small
Y07385	cdc14-3	YFR028C	26oC	Small
Y07353	cdc14-1	YFR028C	30oC	Small
Y07236	cdc3-3	YLR314C	30oC	Small
Y06502	stt4-4	YLR305C	37oC	Small
Y06468	mcm2-1	YBL023C	37oC	Small
Plate 1B
Boone #	ts allele	ORF	ts on SC	Degree
Y08077	rpt4-145	YOR259C	35oC - 37oC	Large
Y07974	dam1-1	YGR113W	35oC	Large
Y07966	dam1-9	YGR113W	37oC	Large
Y07958	duo1-2	YGL061C	37oC	Large
Y08012	smc3-1	YJL074C	30oC	Medium
Y07944	mtw1-ts	YAL034W-A	35oC	Medium
Y07773	gpi13-5	YLL031C	35oC	Medium
Y07772	gpi13-3	YLL031C	30oC	Medium
Y07976	tid3-1	YIL144W	30oC	Small
Y07962	dam1-5	YGR113W	30oC - 35oC	Small
Y07868	act1-129	YFL039C	37oC	Small
Y07850	act1-111	YFL039C	26oC - 30oC	Small
Y07833	kar2-159	YJL034W	30oC	Small
Y07829	cdc48-2	YDL126C	30oC, slow at 22oC - 26oC	Small
Y07827	cdc48-3	YDL126C	35oC	Small
Y07805	gab1-3	YLR459W	37oC	Small
Y07988	mak21-3	YDR060W	38.5oC slow	Medium
Y07943	cof1-5	YLL050C	37oC - 38.5oC	Small
Y07908	tem1-3	YML064C	30oC	Small
Plate 1A
Boone #	ts allele	ORF	ts on SC	Effect
Y08897	gpi8-ts	YDR331W	35oC	Medium
Y08875	pol12-ts	YBL035C	30oC - 35oC	Medium
Y08867	sec8-6	YPR055W	35oC - 37oC	Medium
Y08890	cdc20-3	YGL116W	35oC	Small
Y08855	cdc35-1	YJL005W	35oC - 37oC	Medium
Y08711	dpb2-1	YPR175W	30oC - 35oC	Small
Y08682	arp3-D11A	YJR065C	38.5oC	Medium
Y08411	krr1-18	YCL059C	35oC - 37oC	Small
Y08421	nog1-1	YPL093W	38.5oC very slow	Small
Y08317	cdc37-1	YDR168W	37oC - 38.5oC	Medium
Y08281	orc2-4	YBR060C	37oC - 38.5oC, slow 26oC - 35oC	Medium
Y08261	spc24-10	YMR117C	35oC	Medium
Y08260	dpb11-1	YJL090C	37oC - 38.5oC	Medium
Y08283	orc2-2	YBR060C	30oC - 35oC	Small
Y08235	arp3-G15C	YJR065C	37oC - 38.5oC	Large
Y08231	arp3-H161A	YJR065C	37oC - 38.5oC	Medium
Y08196	spc24 4-2	YMR117C	35oC	Medium
Y08224	orc2-1	YBR060C	30oC	Small
Y08189	tys1-1	YGR185C	35oC	Small
Y08194	pre3-2	YJL001W	38.5oC slow	Small

## Sheet: By Rescue Degree
TS mutants rescued by TMAO, sorted by degree of rescue
Boone #	ts allele	ORF	ts on SC	96 Plate	96 Row	96 Column	R or S	Degree	TS temp
Y09468	alg2-1	YGL065C	35oC	2A	G	5	R	Large	35
Y08235	arp3-G15C	YJR065C	37oC - 38.5oC	1A	H	3	R	Large	37
Y11891	ask1-3	YKL052C	35oC - 37oC	5A	D	6	R	Large	35
Y06414	ccl1-ts4	YPR025C	37oC	1D	B	8	R	Large	37
Y11694	cdc53-1	YDL132W	35oC - 37oC	5A	B	2	R	Large	35
Y07974	dam1-1	YGR113W	35oC	1B	D	8	R	Large	35
Y07966	dam1-9	YGR113W	37oC	1B	D	10	R	Large	37
Y07958	duo1-2	YGL061C	37oC	1B	E	2	R	Large	37
Y11755	gfa1-97	YKL104C	30oC	5A	C	5	R	Large	30
Y09957	pkc1-1	YBL105C	35oC - 37oC	2B	E	9	R	Large	35
Y09962	pkc1-2	YBL105C	35oC - 37oC	2B	E	10	R	Large	35
Y09972	pkc1-3	YBL105C	37oC	2B	F	1	R	Large	37
Y09967	pkc1-4	YBL105C	35oC	2B	E	11	R	Large	35
Y08077	rpt4-145	YOR259C	35oC - 37oC	1B	C	2	R	Large	35
Y10074	scd5-D338	YOR329C	35oC	2B	H	5	R	Large	35
Y10078	scd5-PP1D2	YOR329C	30oC - 35oC	2B	H	6	R	Large	30
Y05582	sec14-3	YMR079W	37oC	1D	D	8	R	Large	37
Y06499	sec8-9	YPR055W	37oC	1C	F	11	R	Large	37
Y05603	sec9-4	YGR009C	37oC	1D	D	4	R	Large	37
Y10662	slu7-ts1	YDR088C	35oC	2C	B	5	R	Large	35
Y11313	ssl1-T242I	YLR005W	35oC	2D	G	8	R	Large	35
Y10370	ssl2-ts	YIL143C	30oC - 35oC	2C	C	1	R	Large	30
Y10082	tsc3-2	YBR058C-A	35oC	2B	H	7	R	Large	35
Y12311	ura6-4	YKL024C	35oC, slow at 22oC - 30oC	5A	F	11	R	Large	35
Y10293	vti1-11	YMR197C	30oC - 35oC	2C	D	2	R	Large	30
Y09500	arc35-6	YNR035C	35oC - 37oC	2A	H	3	R	Medium	35
Y08682	arp3-D11A	YJR065C	38.5oC	1A	D	8	R	Medium	38
Y08231	arp3-H161A	YJR065C	37oC - 38.5oC	1A	H	4	R	Medium	37
Y10695	bms1-1	YPL217C	30oC, slow at all	2D	A	6	R	Medium	30
Y06420	cdc10-2	YCR002C	37oC	1D	C	6	R	Medium	37
Y09007	cdc20-2	YGL116W	37oC - 38.5oC	2A	C	9	R	Medium	37
Y04872	cdc25-1	YLR310C	37oC	1D	H	2	R	Medium	37
Y08855	cdc35-1	YJL005W	35oC - 37oC	1A	C	7	R	Medium	35
Y08317	cdc37-1	YDR168W	37oC - 38.5oC	1A	F	8	R	Medium	37
Y06453	cdc39-1	YCR093W	37oC	1D	B	4	R	Medium	37
Y07731	cdc48-9	YDL126C	35oC	1C	B	2	R	Medium	35
Y09261	dad2-9	YKR083C	37oC	2A	D	5	R	Medium	37
Y08260	dpb11-1	YJL090C	37oC - 38.5oC	1A	G	11	R	Medium	37
Y09313	dsn1-7	YIR010W	35oC	2A	E	3	R	Medium	35
Y09317	dsn1-8	YIR010W	35oC - 37oC	2A	E	4	R	Medium	35
Y11752	efb1-4	YAL003W	37oC, slow 22oC - 26oC	5A	C	3	R	Medium	37
Y09883	erg10-1	YPL028W	30oC - 35oC	2B	E	3	R	Medium	30
Y11254	erg26-1	YGL001C	30oC - 35oC	2D	F	10	R	Medium	30
Y08899	frq1-1	YDR373W	35oC - 37oC	2A	B	3	R	Medium	35
Y07772	gpi13-3	YLL031C	30oC	1B	H	9	R	Medium	30
Y07773	gpi13-5	YLL031C	35oC	1B	H	8	R	Medium	35
Y08897	gpi8-ts	YDR331W	35oC	1A	B	2	R	Medium	35
Y09259	hsf1-848	YGL073W	37oC	2A	D	3	R	Medium	37
Y10156	lcb1-5	YMR296C	35oC	2C	G	1	R	Medium	35
Y09576	mas1-1	YLR163C	30oC - 35oC	2B	B	5	R	Medium	30
Y06474	mcm3-1	YEL032W	37oC	1C	G	9	R	Medium	37
Y06477	mif2-3	YKL089W	37oC	1C	G	8	R	Medium	37
Y07944	mtw1-ts	YAL034W-A	35oC	1B	E	6	R	Medium	35
Y10752	nmt1-181	YLR195C	35oC - 37oC	2D	B	6	R	Medium	35
Y09328	nnf1-48	YJR112W	35oC - 37oC	2A	E	7	R	Medium	35
Y10269	nop2-3	YNL061W	35oC - 37oC	2C	E	1	R	Medium	35
Y09446	nsl1-6	YPL233W	35oC - 37oC	2A	F	8	R	Medium	35
Y08281	orc2-4	YBR060C	37oC - 38.5oC, slow 26oC - 35oC	1A	G	4	R	Medium	37
Y06446	pgi1-2	YBR196C	37oC	1D	B	6	R	Medium	37
Y06481	pik1-104	YNL267W	37oC	1C	G	6	R	Medium	37
Y08875	pol12-ts	YBL035C	30oC - 35oC	1A	B	8	R	Medium	30
Y09520	pti1-ts7	YGR156W	35oC - 37oC	2A	H	9	R	Medium	35
Y07780	rgr1-100	YLR071C	38.5oC	4B	D	7	R	Medium	38
Y04720	rho1-td	YPR165W	37oC	1D	H	10	R	Medium	37
Y10791	rpb2-6	YOR151C	35oC - 37oC	2D	B	9	R	Medium	35
Y10324	rpc40-V78R	YPR110C	35oC	2C	C	7	R	Medium	35
Y12326	rpn6-1	YDL097C	37oC	5A	G	3	R	Medium	37
Y09453	sec24-20	YIL109C	26oC - 30oC	2A	F	12	R	Medium	26
Y05572	sec5-24	YDR166C	37oC	1D	E	10	R	Medium	37
Y09193	sec59-ts	YMR013C	35oC - 37oC	2A	D	2	R	Medium	35
Y08867	sec8-6	YPR055W	35oC - 37oC	1A	B	9	R	Medium	35
Y09267	sgt1-5	YOR057W	35oC - 37oC	2A	D	7	R	Medium	35
Y12293	sgv1-23	YPR161C	35oC - 37oC	5A	F	7	R	Medium	35
Y12300	sgv1-35	YPR161C	37oC	5A	F	9	R	Medium	37
Y08012	smc3-1	YJL074C	30oC	1B	C	6	R	Medium	30
Y11279	smc6-9	YLR383W	37oC - 38.5oC	2D	G	3	R	Medium	37
Y08261	spc24-10	YMR117C	35oC	1A	G	10	R	Medium	35
Y08196	spc24 4-2	YMR117C	35oC	1A	H	8	R	Medium	35
Y09508	spc25-1	YER018C	30oC - 35oC	2A	H	5	R	Medium	30
Y11921	spn1-K192N	YPR133C	37oC	5A	E	3	R	Medium	37
Y06553	ssu72-2	YNL222W	37oC	4B	D	1	R	Medium	37
Y10800	taf8-7	YML114C	35oC	2D	B	11	R	Medium	35
Y10805	tap42-11	YMR028W	37oC	2D	C	1	R	Medium	37
Y11146	tub4-ΔDSY	YLR212C	35oC - 37oC	2D	D	10	R	Medium	35
Y07766	uba1-1	YKL210W	37oC	1C	A	2	R	Medium	37
Y12315	ura6-6	YKL024C	35oC	5A	G	2	R	Medium	35
Y10339	yhc1-7	YLR298C	26oC - 30oC, slow at 22oC	2C	C	2	R	Medium	26
Y07850	act1-111	YFL039C	26oC - 30oC	1B	G	3	R	Small	26
Y07868	act1-129	YFL039C	37oC	1B	F	6	R	Small	37
Y10614	cak1-23	YFL029C	35oC	2C	B	11	R	Small	35
Y05569	cdc12-td	YHR107C	37oC	1D	E	11	R	Small	37
Y07353	cdc14-1	YFR028C	30oC	1C	D	12	R	Small	30
Y07385	cdc14-3	YFR028C	26oC	1C	D	11	R	Small	26
Y08996	cdc1-6	YDR182W	26oC - 30oC	2A	C	6	R	Small	26
Y08890	cdc20-3	YGL116W	35oC	1A	B	5	R	Small	35
Y07386	cdc21-ts	YOR074C	35oC	1C	D	10	R	Small	35
Y08987	cdc24-3	YAL041W	35oC - 37oC	2A	C	4	R	Small	35
Y07236	cdc3-3	YLR314C	30oC	1C	F	3	R	Small	30
Y06447	cdc34-1	YDR054C	37oC	1D	B	5	R	Small	37
Y08916	cdc46-1	YLR274W	35oC - 37oC	2A	B	7	R	Small	35
Y07829	cdc48-2	YDL126C	30oC, slow at 22oC - 26oC	1B	G	8	R	Small	30
Y07827	cdc48-3	YDL126C	35oC	1B	G	9	R	Small	35
Y05129	cdc9-1	YDL164C	37oC	1D	G	4	R	Small	37
Y10928	cef1-13	YMR213W	35oC - 37oC	2D	C	6	R	Small	35
Y07962	dam1-5	YGR113W	30oC - 35oC	1B	D	11	R	Small	30
Y08711	dpb2-1	YPR175W	30oC - 35oC	1A	C	12	R	Small	30
Y07805	gab1-3	YLR459W	37oC	1B	H	3	R	Small	37
Y10250	gcd14-4	YJL125C	35oC	2C	E	5	R	Small	35
Y07833	kar2-159	YJL034W	30oC	1B	G	7	R	Small	30
Y08411	krr1-18	YCL059C	35oC - 37oC	1A	E	11	R	Small	35
Y10161	lcb1-2	YMR296C	30oC - 35oC	2C	F	10	R	Small	30
Y10158	lcb1-4	YMR296C	30oC	2C	F	11	R	Small	30
Y10124	lcb2-1	YDR062W	30oC	2C	H	3	R	Small	30
Y10099	lcb2-2	YDR062W	30oC	2B	H	11	R	Small	30
Y11009	luc7-1	YDL087C	35oC	2D	D	3	R	Small	35
Y06468	mcm2-1	YBL023C	37oC	1C	G	10	R	Small	37
Y10223	mtr3-ts	YGR158C	35oC	2C	E	11	R	Small	35
Y08224	orc2-1	YBR060C	30oC	1A	H	6	R	Small	30
Y08283	orc2-2	YBR060C	30oC - 35oC	1A	G	2	R	Small	30
Y09296	prp18-1202	YGR006W	35oC	2A	D	10	R	Small	35
Y10747	ret3-1	YPL010W	35oC	2D	B	5	R	Small	35
Y07439	rfc4-20	YOL094C	35oC - 37oC	1C	B	10	R	Small	35
Y11833	rpg1-1	YBR079C	35oC	5A	C	6	R	Small	35
Y07751	rpt6-20	YGL048C	37oC	4B	D	6	R	Small	37
Y07752	rpt6-25	YGL048C	37oC - 38.5oC	1C	A	7	R	Small	37
Y10738	rrs1-124	YOR294W	35oC - 37oC	2D	B	3	R	Small	35
Y11867	rsc8-ts16	YFR037C	35oC - 37oC	5A	D	2	R	Small	35
Y06265	sec10-2	YLR166C	37oC	1D	D	10	R	Small	37
Y05361	sec17-1	YBL050W	37oC	1D	F	4	R	Small	37
Y12298	sgv1-80	YPR161C	35oC - 37oC	5A	F	8	R	Small	35
Y10667	slu7-ts2	YDR088C	35oC	2C	B	4	R	Small	35
Y06277	smc1-259	YFL008W	37oC	1D	D	5	R	Small	37
Y09517	spt15-P65S	YER148W	30oC - 35oC	2A	H	8	R	Small	30
Y06502	stt4-4	YLR305C	37oC	1C	F	10	R	Small	37
Y10197	taf6-ts	YGL112C	37oC	2C	F	5	R	Small	37
Y10307	taf7-ts1	YMR227C	35oC - 37oC	2C	C	11	R	Small	35
Y07976	tid3-1	YIL144W	30oC	1B	D	7	R	Small	30
Y08189	tys1-1	YGR185C	35oC	1A	H	11	R	Small	35
Y10290	yhc1-2	YLR298C	30oC - 35oC	2C	D	4	R	Small	30
Y11906	ask1-2	YKL052C	37oC	5A	D	7	S	Small	37
Y07943	cof1-5	YLL050C	37oC - 38.5oC	1B	E	7	S	Small	37
Y10199	mob2-11	YFL034C-B	26oC - 30oC, slow at 22oC	2C	F	4	S	Small	26
Y10212	mob2-22	YFL034C-B	35oC - 37oC	2C	F	3	S	Small	35
Y10219	mob2-34	YFL034C-B	30oC - 35oC	2C	F	2	S	Small	30
Y10222	mob2-40	YFL034C-B	26oC - 30oC	2C	F	1	S	Small	26
Y08421	nog1-1	YPL093W	38.5oC very slow	1A	E	8	S	Small	38
Y08194	pre3-2	YJL001W	38.5oC slow	1A	H	9	S	Small	38
Y10633	rho3-1	YIL118W	30oC - 35oC, grows at 37oC - 38.5oC	2C	B	7	S	Small	30
Y09459	sfi1-7	YLL003W	35oC - 37oC	2A	G	3	S	Small	35
Y11705	sub2-1	YDL084W	30oC	5A	B	4	S	Small	30
Y10332	taf11-ts2	YML015C	35oC - 37oC	2C	C	4	S	Small	35
Y07908	tem1-3	YML064C	30oC	1B	F	4	S	Small	30
Y10137	ypt1-3	YFL038C	37oC - 38.5oC	2C	G	10	S	Small	37
Y12346	brl1-2221	YHR036W	37oC	5A	G	6	S	Medium	37
Y12352	brl1-3231	YHR036W	37oC	5A	G	7	S	Medium	37
Y12354	brl1-C371R	YHR036W	37oC	5A	G	9	S	Medium	37
Y12360	brl1-C371S	YHR036W	37oC	5A	G	10	S	Medium	37
Y12366	brl1-K405I	YHR036W	37oC	5A	G	11	S	Medium	37
Y05078	cdc20-1	YGL116W	37oC	4B	C	9	S	Medium	37
Y05295	cog3-1	YER157W	38.5oC	1D	F	8	S	Medium	38
Y04662	erg11-td	YHR007C	37oC	1D	H	11	S	Medium	37
Y07988	mak21-3	YDR060W	38.5oC slow	1B	D	3	S	Medium	38
Y10139	use1-ts	YGL098W	35oC - 37oC	2C	G	9	S	Medium	35
Y04722	yif1-td	YNL263C	37oC	1D	H	9	S	Medium	37

## Sheet: Alphabetical
TS mutants rescued by TMAO, alphabetized by gene name
Boone #	ts allele	ORF	ts on SC	96 Plate	96 Row	96 Column	R or S	Degree
Y07850	act1-111	YFL039C	26oC - 30oC	1B	G	3	R	Small
Y07868	act1-129	YFL039C	37oC	1B	F	6	R	Small
Y09468	alg2-1	YGL065C	35oC	2A	G	5	R	Large
Y09500	arc35-6	YNR035C	35oC - 37oC	2A	H	3	R	Medium
Y08682	arp3-D11A	YJR065C	38.5oC	1A	D	8	R	Medium
Y08235	arp3-G15C	YJR065C	37oC - 38.5oC	1A	H	3	R	Large
Y08231	arp3-H161A	YJR065C	37oC - 38.5oC	1A	H	4	R	Medium
Y11906	ask1-2	YKL052C	37oC	5A	D	7	S	Small
Y11891	ask1-3	YKL052C	35oC - 37oC	5A	D	6	R	Large
Y10695	bms1-1	YPL217C	30oC, slow at all	2D	A	6	R	Medium
Y12346	brl1-2221	YHR036W	37oC	5A	G	6	S	Medium
Y12352	brl1-3231	YHR036W	37oC	5A	G	7	S	Medium
Y12354	brl1-C371R	YHR036W	37oC	5A	G	9	S	Medium
Y12360	brl1-C371S	YHR036W	37oC	5A	G	10	S	Medium
Y12366	brl1-K405I	YHR036W	37oC	5A	G	11	S	Medium
Y10614	cak1-23	YFL029C	35oC	2C	B	11	R	Small
Y06414	ccl1-ts4	YPR025C	37oC	1D	C	8	R	Large
Y06420	cdc10-2	YCR002C	37oC	1D	C	6	R	Medium
Y05569	cdc12-td	YHR107C	37oC	1D	E	11	R	Small
Y07353	cdc14-1	YFR028C	30oC	1C	D	12	R	Small
Y07385	cdc14-3	YFR028C	26oC	1C	D	11	R	Small
Y08996	cdc1-6	YDR182W	26oC - 30oC	2A	C	6	R	Small
Y05078	cdc20-1	YGL116W	37oC	4B	C	9	S	Medium
Y09007	cdc20-2	YGL116W	37oC - 38.5oC	2A	C	9	R	Medium
Y08890	cdc20-3	YGL116W	35oC	1A	B	5	R	Small
Y07386	cdc21-ts	YOR074C	35oC	1C	D	10	R	Small
Y08987	cdc24-3	YAL041W	35oC - 37oC	2A	C	4	R	Small
Y04872	cdc25-1	YLR310C	37oC	1D	H	2	R	Medium
Y07236	cdc3-3	YLR314C	30oC	1C	F	3	R	Small
Y06447	cdc34-1	YDR054C	37oC	1D	B	5	R	Small
Y08855	cdc35-1	YJL005W	35oC - 37oC	1A	C	7	R	Medium
Y08317	cdc37-1	YDR168W	37oC - 38.5oC	1A	F	8	R	Medium
Y06453	cdc39-1	YCR093W	37oC	1D	B	4	R	Medium
Y08916	cdc46-1	YLR274W	35oC - 37oC	2A	B	7	R	Small
Y07829	cdc48-2	YDL126C	30oC, slow at 22oC - 26oC	1B	G	8	R	Small
Y07827	cdc48-3	YDL126C	35oC	1B	G	9	R	Small
Y07731	cdc48-9	YDL126C	35oC	1C	B	2	R	Medium
Y11694	cdc53-1	YDL132W	35oC - 37oC	5A	B	2	R	Large
Y05129	cdc9-1	YDL164C	37oC	1D	G	4	R	Small
Y10928	cef1-13	YMR213W	35oC - 37oC	2D	C	6	R	Small
Y07943	cof1-5	YLL050C	37oC - 38.5oC	1B	E	7	S	Small
Y05295	cog3-1	YER157W	38.5oC	1D	F	8	S	Medium
Y09261	dad2-9	YKR083C	37oC	2A	D	5	R	Medium
Y07974	dam1-1	YGR113W	35oC	1B	D	8	R	Large
Y07962	dam1-5	YGR113W	30oC - 35oC	1B	D	11	R	Small
Y07966	dam1-9	YGR113W	37oC	1B	D	10	R	Large
Y08260	dpb11-1	YJL090C	37oC - 38.5oC	1A	G	11	R	Medium
Y08711	dpb2-1	YPR175W	30oC - 35oC	1A	C	12	R	Small
Y09313	dsn1-7	YIR010W	35oC	2A	E	3	R	Medium
Y09317	dsn1-8	YIR010W	35oC - 37oC	2A	E	4	R	Medium
Y07958	duo1-2	YGL061C	37oC	1B	E	2	R	Large
Y11752	efb1-4	YAL003W	37oC, slow 22oC - 26oC	5A	C	3	R	Medium
Y09883	erg10-1	YPL028W	30oC - 35oC	2B	E	3	R	Medium
Y04662	erg11-td	YHR007C	37oC	1D	H	11	S	Medium
Y11254	erg26-1	YGL001C	30oC - 35oC	2D	F	10	R	Medium
Y08899	frq1-1	YDR373W	35oC - 37oC	2A	B	3	R	Medium
Y07805	gab1-3	YLR459W	37oC	1B	H	3	R	Small
Y10250	gcd14-4	YJL125C	35oC	2C	E	5	R	Small
Y11755	gfa1-97	YKL104C	30oC	5A	C	5	R	Large
Y07772	gpi13-3	YLL031C	30oC	1B	H	9	R	Medium
Y07773	gpi13-5	YLL031C	35oC	1B	H	8	R	Medium
Y08897	gpi8-ts	YDR331W	35oC	1A	B	2	R	Medium
Y09259	hsf1-848	YGL073W	37oC	2A	D	3	R	Medium
Y07833	kar2-159	YJL034W	30oC	1B	G	7	R	Small
Y08411	krr1-18	YCL059C	35oC - 37oC	1A	E	11	R	Small
Y10161	lcb1-2	YMR296C	30oC - 35oC	2C	F	10	R	Small
Y10158	lcb1-4	YMR296C	30oC	2C	F	11	R	Small
Y10156	lcb1-5	YMR296C	35oC	2C	G	1	R	Medium
Y10124	lcb2-1	YDR062W	30oC	2C	H	3	R	Small
Y10099	lcb2-2	YDR062W	30oC	2B	H	11	R	Small
Y11009	luc7-1	YDL087C	35oC	2D	D	3	R	Small
Y07988	mak21-3	YDR060W	38.5oC slow	1B	D	3	S	Medium
Y09576	mas1-1	YLR163C	30oC - 35oC	2B	B	5	R	Medium
Y06468	mcm2-1	YBL023C	37oC	1C	G	10	R	Small
Y06474	mcm3-1	YEL032W	37oC	1C	G	9	R	Medium
Y06477	mif2-3	YKL089W	37oC	1C	G	8	R	Medium
Y10199	mob2-11	YFL034C-B	26oC - 30oC, slow at 22oC	2C	F	4	S	Small
Y10212	mob2-22	YFL034C-B	35oC - 37oC	2C	F	3	S	Small
Y10219	mob2-34	YFL034C-B	30oC - 35oC	2C	F	2	S	Small
Y10222	mob2-40	YFL034C-B	26oC - 30oC	2C	F	1	S	Small
Y10223	mtr3-ts	YGR158C	35oC	2C	E	11	R	Small
Y07944	mtw1-ts	YAL034W-A	35oC	1B	E	6	R	Medium
Y10752	nmt1-181	YLR195C	35oC - 37oC	2D	B	6	R	Medium
Y09328	nnf1-48	YJR112W	35oC - 37oC	2A	E	7	R	Medium
Y08421	nog1-1	YPL093W	38.5oC very slow	1A	E	8	S	Small
Y10269	nop2-3	YNL061W	35oC - 37oC	2C	E	1	R	Medium
Y09446	nsl1-6	YPL233W	35oC - 37oC	2A	F	8	R	Medium
Y08224	orc2-1	YBR060C	30oC	1A	H	6	R	Small
Y08283	orc2-2	YBR060C	30oC - 35oC	1A	G	2	R	Small
Y08281	orc2-4	YBR060C	37oC - 38.5oC, slow 26oC - 35oC	1A	G	4	R	Medium
Y06446	pgi1-2	YBR196C	37oC	1D	B	6	R	Medium
Y06481	pik1-104	YNL267W	37oC	1C	G	6	R	Medium
Y09957	pkc1-1	YBL105C	35oC - 37oC	2B	E	9	R	Large
Y09962	pkc1-2	YBL105C	35oC - 37oC	2B	E	10	R	Large
Y09972	pkc1-3	YBL105C	37oC	2B	F	1	R	Large
Y09967	pkc1-4	YBL105C	35oC	2B	E	11	R	Large
Y08875	pol12-ts	YBL035C	30oC - 35oC	1A	B	8	R	Medium
Y08194	pre3-2	YJL001W	38.5oC slow	1A	H	9	S	Small
Y09296	prp18-1202	YGR006W	35oC	2A	D	10	R	Small
Y09520	pti1-ts7	YGR156W	35oC - 37oC	2A	H	9	R	Medium
Y10747	ret3-1	YPL010W	35oC	2D	B	5	R	Small
Y07439	rfc4-20	YOL094C	35oC - 37oC	1C	B	10	R	Small
Y07780	rgr1-100	YLR071C	38.5oC	4B	D	7	R	Medium
Y04720	rho1-td	YPR165W	37oC	1D	H	10	R	Medium
Y10633	rho3-1	YIL118W	30oC - 35oC, grows at 37oC - 38.5oC	2C	B	7	S	Small
Y10791	rpb2-6	YOR151C	35oC - 37oC	2D	B	9	R	Medium
Y10324	rpc40-V78R	YPR110C	35oC	2C	C	7	R	Medium
Y11833	rpg1-1	YBR079C	35oC	5A	C	6	R	Small
Y12326	rpn6-1	YDL097C	37oC	5A	G	3	R	Medium
Y08077	rpt4-145	YOR259C	35oC - 37oC	1B	C	2	R	Large
Y07751	rpt6-20	YGL048C	37oC	4B	D	6	R	Small
Y07752	rpt6-25	YGL048C	37oC - 38.5oC	1C	A	7	R	Small
Y10738	rrs1-124	YOR294W	35oC - 37oC	2D	B	3	R	Small
Y11867	rsc8-ts16	YFR037C	35oC - 37oC	5A	D	2	R	Small
Y10074	scd5-D338	YOR329C	35oC	2B	H	5	R	Large
Y10078	scd5-PP1D2	YOR329C	30oC - 35oC	2B	H	6	R	Large
Y06265	sec10-2	YLR166C	37oC	1D	D	10	R	Small
Y05582	sec14-3	YMR079W	37oC	1D	E	8	R	Large
Y05361	sec17-1	YBL050W	37oC	1D	F	4	R	Small
Y09453	sec24-20	YIL109C	26oC - 30oC	2A	F	12	R	Medium
Y05572	sec5-24	YDR166C	37oC	1D	E	10	R	Medium
Y09193	sec59-ts	YMR013C	35oC - 37oC	2A	D	2	R	Medium
Y08867	sec8-6	YPR055W	35oC - 37oC	1A	B	9	R	Medium
Y06499	sec8-9	YPR055W	37oC	1C	F	11	R	Large
Y05603	sec9-4	YGR009C	37oC	1D	E	4	R	Large
Y09459	sfi1-7	YLL003W	35oC - 37oC	2A	G	3	S	Small
Y09267	sgt1-5	YOR057W	35oC - 37oC	2A	D	7	R	Medium
Y12293	sgv1-23	YPR161C	35oC - 37oC	5A	F	7	R	Medium
Y12300	sgv1-35	YPR161C	37oC	5A	F	9	R	Medium
Y12298	sgv1-80	YPR161C	35oC - 37oC	5A	F	8	R	Small
Y10662	slu7-ts1	YDR088C	35oC	2C	B	5	R	Large
Y10667	slu7-ts2	YDR088C	35oC	2C	B	4	R	Small
Y06277	smc1-259	YFL008W	37oC	1D	D	5	R	Small
Y08012	smc3-1	YJL074C	30oC	1B	C	6	R	Medium
Y11279	smc6-9	YLR383W	37oC - 38.5oC	2D	G	3	R	Medium
Y08261	spc24-10	YMR117C	35oC	1A	G	10	R	Medium
Y08196	spc24 4-2	YMR117C	35oC	1A	H	8	R	Medium
Y09508	spc25-1	YER018C	30oC - 35oC	2A	H	5	R	Medium
Y11921	spn1-K192N	YPR133C	37oC	5A	E	3	R	Medium
Y09517	spt15-P65S	YER148W	30oC - 35oC	2A	H	8	R	Small
Y11313	ssl1-T242I	YLR005W	35oC	2D	G	8	R	Large
Y10370	ssl2-ts	YIL143C	30oC - 35oC	2C	C	1	R	Large
Y06553	ssu72-2	YNL222W	37oC	4B	D	1	R	Medium
Y06502	stt4-4	YLR305C	37oC	1C	F	10	R	Small
Y11705	sub2-1	YDL084W	30oC	5A	B	4	S	Small
Y10332	taf11-ts2	YML015C	35oC - 37oC	2C	C	4	S	Small
Y10197	taf6-ts	YGL112C	37oC	2C	F	5	R	Small
Y10307	taf7-ts1	YMR227C	35oC - 37oC	2C	C	11	R	Small
Y10800	taf8-7	YML114C	35oC	2D	B	11	R	Medium
Y10805	tap42-11	YMR028W	37oC	2D	C	1	R	Medium
Y07908	tem1-3	YML064C	30oC	1B	F	4	S	Small
Y07976	tid3-1	YIL144W	30oC	1B	D	7	R	Small
Y10082	tsc3-2	YBR058C-A	35oC	2B	H	7	R	Large
Y11146	tub4-ΔDSY	YLR212C	35oC - 37oC	2D	D	10	R	Medium
Y08189	tys1-1	YGR185C	35oC	1A	H	11	R	Small
Y07766	uba1-1	YKL210W	37oC	1C	A	2	R	Medium
Y12311	ura6-4	YKL024C	35oC, slow at 22oC - 30oC	5A	F	11	R	Large
Y12315	ura6-6	YKL024C	35oC	5A	G	2	R	Medium
Y10139	use1-ts	YGL098W	35oC - 37oC	2C	G	9	S	Medium
Y10293	vti1-11	YMR197C	30oC - 35oC	2C	D	2	R	Large
Y10290	yhc1-2	YLR298C	30oC - 35oC	2C	D	4	R	Small
Y10339	yhc1-7	YLR298C	26oC - 30oC, slow at 22oC	2C	C	2	R	Medium
Y04722	yif1-td	YNL263C	37oC	1D	H	9	S	Medium
Y10137	ypt1-3	YFL038C	37oC - 38.5oC	2C	G	10	S	Small

## Sheet: Multiple alleles
Genes with multiple TS alleles rescued by TMAO
Boone #	ts allele	ORF	ts on SC	96 Plate	96 Row	96 Column	R or S	Degree
Y07850	act1-111	YFL039C	26oC - 30oC	1B	G	3	R	Small
Y07868	act1-129	YFL039C	37oC	1B	F	6	R	Small
Y08235	arp3-G15C	YJR065C	37oC - 38.5oC	1A	H	3	R	Large
Y08682	arp3-D11A	YJR065C	38.5oC	1A	D	8	R	Medium
Y08231	arp3-H161A	YJR065C	37oC - 38.5oC	1A	H	4	R	Medium
Y12346	brl1-2221	YHR036W	37oC	5A	G	6	S	Medium
Y12352	brl1-3231	YHR036W	37oC	5A	G	7	S	Medium
Y12354	brl1-C371R	YHR036W	37oC	5A	G	9	S	Medium
Y12360	brl1-C371S	YHR036W	37oC	5A	G	10	S	Medium
Y12366	brl1-K405I	YHR036W	37oC	5A	G	11	S	Medium
Y07353	cdc14-1	YFR028C	30oC	1C	D	12	R	Small
Y07385	cdc14-3	YFR028C	26oC	1C	D	11	R	Small
Y05078	cdc20-1	YGL116W	37oC	4B	C	9	S	Medium
Y09007	cdc20-2	YGL116W	37oC - 38.5oC	2A	C	9	R	Medium
Y08890	cdc20-3	YGL116W	35oC	1A	B	5	R	Small
Y07829	cdc48-2	YDL126C	30oC, slow at 22oC - 26oC	1B	G	8	R	Small
Y07827	cdc48-3	YDL126C	35oC	1B	G	9	R	Small
Y07731	cdc48-9	YDL126C	35oC	1C	B	2	R	Medium
Y07731	cdc48-9	YDL126C	35oC	1C	B	2	R	Medium
Y07974	dam1-1	YGR113W	35oC	1B	D	8	R	Large
Y07962	dam1-5	YGR113W	30oC - 35oC	1B	D	11	R	Small
Y07966	dam1-9	YGR113W	37oC	1B	D	10	R	Large
Y09313	dsn1-7	YIR010W	35oC	2A	E	3	R	Medium
Y09317	dsn1-8	YIR010W	35oC - 37oC	2A	E	4	R	Medium
Y07772	gpi13-3	YLL031C	30oC	1B	H	9	R	Medium
Y07773	gpi13-5	YLL031C	35oC	1B	H	8	R	Medium
Y10161	lcb1-2	YMR296C	30oC - 35oC	2C	F	10	R	Small
Y10158	lcb1-4	YMR296C	30oC	2C	F	11	R	Small
Y10156	lcb1-5	YMR296C	35oC	2C	G	1	R	Medium
Y10124	lcb2-1	YDR062W	30oC	2C	H	3	R	Small
Y10099	lcb2-2	YDR062W	30oC	2B	H	11	R	Small
Y10199	mob2-11	YFL034C-B	26oC - 30oC, slow at 22oC	2C	F	4	S	Small
Y10212	mob2-22	YFL034C-B	35oC - 37oC	2C	F	3	S	Small
Y10219	mob2-34	YFL034C-B	30oC - 35oC	2C	F	2	S	Small
Y10222	mob2-40	YFL034C-B	26oC - 30oC	2C	F	1	S	Small
Y08224	orc2-1	YBR060C	30oC	1A	H	6	R	Small
Y08283	orc2-2	YBR060C	30oC - 35oC	1A	G	2	R	Small
Y08281	orc2-4	YBR060C	37oC - 38.5oC, slow 26oC - 35oC	1A	G	4	R	Medium
Y09957	pkc1-1	YBL105C	35oC - 37oC	2B	E	9	R	Large
Y09962	pkc1-2	YBL105C	35oC - 37oC	2B	E	10	R	Large
Y09972	pkc1-3	YBL105C	37oC	2B	F	1	R	Large
Y09967	pkc1-4	YBL105C	35oC	2B	E	11	R	Large
Y04720	rho1-td	YPR165W	37oC	1D	H	10	R	Medium
Y07751	rpt6-20	YGL048C	37oC	4B	D	6	R	Small
Y07752	rpt6-25	YGL048C	37oC - 38.5oC	1C	A	7	R	Small
Y10074	scd5-D338	YOR329C	35oC	2B	H	5	R	Large
Y10078	scd5-PP1D2	YOR329C	30oC - 35oC	2B	H	6	R	Large
Y08867	sec8-6	YPR055W	35oC - 37oC	1A	B	9	R	Medium
Y06499	sec8-9	YPR055W	37oC	1C	F	11	R	Large
Y12293	sgv1-23	YPR161C	35oC - 37oC	5A	F	7	R	Medium
Y12300	sgv1-35	YPR161C	37oC	5A	F	9	R	Medium
Y12298	sgv1-80	YPR161C	35oC - 37oC	5A	F	8	R	Small
Y10662	slu7-ts1	YDR088C	35oC	2C	B	5	R	Large
Y10667	slu7-ts2	YDR088C	35oC	2C	B	4	R	Small
Y08261	spc24-10	YMR117C	35oC	1A	G	10	R	Medium
Y08196	spc24 4-2	YMR117C	35oC	1A	H	8	R	Medium
Y12311	ura6-4	YKL024C	35oC, slow at 22oC - 30oC	5A	F	11	R	Large
Y12315	ura6-6	YKL024C	35oC	5A	G	2	R	Medium
Y10290	yhc1-2	YLR298C	30oC - 35oC	2C	D	4	R	Small
Y10339	yhc1-7	YLR298C	26oC - 30oC, slow at 22oC	2C	C	2	R	Medium
